# Supplementary material for: Psoriasis and medical ramifications: A comprehensive analysis based on observational meta-analyses
Source: PubMed Central journal article supplement (PMC9465012; doi:10.3389/fmed.2022.998815), 2022-08-29
Supplement: Table_1.pdf [file Table_1.pdf]

Supplementary Table 1. Characteristics of the unique meta-analyses investigating the associations between psoriasis and multiple health outcomes.

| Health outcomes                  | Author, year          | Case-control/cross-sectional/cohort/total studies (n) | Participants (n)          | Events (n) | Type of metric | Effect size      |                | Heterogeneity         |                | Small-study effect |
|----------------------------------|-----------------------|-------------------------------------------------------|---------------------------|------------|----------------|------------------|----------------|-----------------------|----------------|--------------------|
|                                  |                       |                                                       |                           |            |                | 95% CI           | <i>P</i> Value | <i>I</i> <sup>2</sup> | <i>P</i> Value |                    |
| <b>Mortality</b>                 |                       |                                                       |                           |            |                |                  |                |                       |                |                    |
| ACM                              | Dhana et al, 2019     | 0/0/6/6                                               | 299374+general population | 19262      | RR             | 1.21 (1.14-1.28) | 0.000          | 90.2                  | <0.001         | 0.108              |
| CVD mortality                    | Dhana et al, 2019     | 0/0/5/5                                               | 162469+general population | 6131       | RR             | 1.14 (1.09-1.21) | 0.000          | 65.9                  | 0.020          | 0.508              |
| Mortality in liver disease       | Dhana et al, 2019     | 0/0/3/3                                               | 39074+general population  | 51         | RR             | 2.31 (1.61-3.31) | 0.000          | NA                    | NA             | NA                 |
| Mortality in respiratory disease | Dhana et al, 2019     | 0/0/3/3                                               | 119241+general population | 542        | RR             | 1.12 (1.02-1.22) | 0.015          | 41.0                  | 0.193          | NA                 |
| Mortality in kidney disease      | Dhana et al, 2019     | 0/0/3/3                                               | 1376+general population   | 29         | RR             | 2.16 (1.37-3.40) | 0.000          | NA                    | NA             | NA                 |
| Mortality in infections          | Dhana et al, 2019     | 0/0/3/3                                               | 119241+general population | 810        | RR             | 1.23 (1.15-1.32) | 0.000          | 12.1                  | 0.286          | NA                 |
| Mortality in malignancy          | Dhana et al, 2019     | 0/0/3/3                                               | 119241+general population | 2465       | RR             | 1.03 (0.99-1.08) | 0.111          | 0.0                   | 0.701          | NA                 |
| Mortality in cancer              | Trafford et al, 2019  | 0/0/2/2                                               | 119241                    | 2455       | RR             | 1.05 (0.96-1.16) | 0.075          | 30.5                  | 0.230          | NA                 |
| <b>Cancer</b>                    |                       |                                                       |                           |            |                |                  |                |                       |                |                    |
| Cancer incidence                 | Trafford et al, 2019  | 0/0/7/7                                               | 259075                    | 9485       | RR             | 1.18 (1.06-1.31) | 0.024          | 90.2                  | 0.000          | 0.328              |
| Respiratory tract cancer         | Pouplard et al, 2013  | 0/0/7/7                                               | 27815                     | >310       | RR             | 1.36 (1.11-1.68) | 0.003          | 53.1                  | 0.047          | 0.014              |
| Upper aerodigestive tract        | Pouplard et al, 2013  | 0/0/5/5                                               | 24770                     | >90        | RR             | 3.05 (1.74-5.32) | 0.000          | 0.0                   | 0.993          | 0.230              |
| Urinary tract cancer             | Pouplard et al, 2013  | 0/0/5/5                                               | 24898                     | >205       | RR             | 1.30 (1.08-1.55) | 0.005          | 7.2                   | 0.366          | 0.527              |
| Colorectal cancer                | Fu et al, 2020        | 0/0/8/8                                               | >1406691                  | 5871       | HR             | 1.16 (1.08-1.25) | 0.000          | 2.6                   | 0.410          | 0.024              |
| Colon cancer                     | Fu et al, 2020        | 0/0/5/5                                               | 1201262                   | 4880       | HR             | 1.14 (1.05-1.24) | 0.010          | 6.4                   | 0.371          | 0.029              |
| Hematologic malignancy           | Bellinato et al, 2021 | 0/0/5/5                                               | 296001                    | 297        | HR             | 1.55 (1.24-1.94) | 0.000          | 0.0                   | 0.676          | 0.431              |
| Lymphoma                         | Bellinato et al, 2021 | 0/0/10/10                                             | >979519                   | 858        | HR             | 1.33 (1.09-1.64) | 0.006          | 60.0                  | 0.008          | 0.578              |
| Hodgkin lymphoma                 | Bellinato et al, 2021 | 0/0/4/4                                               | >888531                   | 41         | HR             | 1.74 (1.13-2.69) | 0.000          | 49.7                  | 0.113          | 0.773              |
| Non-Hodgkin lymphoma             | Bellinato et al, 2021 | 0/0/10/10                                             | >979719                   | 791        | HR             | 1.33 (1.09-1.64) | 0.006          | 60.0                  | 0.008          | 0.469              |
| Cutaneous T-cell lymphoma        | Bellinato et al, 2021 | 0/0/3/3                                               | >16678                    | 21         | HR             | 5.45 (3.49-8.50) | 0.000          | 92.5                  | 0.000          | 0.180              |
| Multiple myeloma                 | Bellinato et al, 2021 | 0/0/2/2                                               | 901802                    | 932        | HR             | 1.32 (1.03-1.69) | 0.030          | 0.0                   | 0.820          | NA                 |
| Leukemia                         | Bellinato et al, 2021 | 0/0/6/6                                               | 999281                    | 1583       | HR             | 1.51 (1.10-2.08) | 0.012          | 64.5                  | 0.015          | 0.254              |

Supplementary Table 1. (continued)

| Health outcomes                   | Author, year          | Case-control/cross-sectional/cohort/Total studies (n) | Participants (n) | Events (n) | Type of metric | Effect size       |                | Heterogeneity         |                | Small-study effect |
|-----------------------------------|-----------------------|-------------------------------------------------------|------------------|------------|----------------|-------------------|----------------|-----------------------|----------------|--------------------|
|                                   |                       |                                                       |                  |            |                | 95% CI            | <i>P</i> Value | <i>I</i> <sup>2</sup> | <i>P</i> Value |                    |
| Non-melanoma skin cancer          | Wang et al, 2020      | 0/0/16/16                                             | 16059500         | >551939    | RR             | 1.72 (1.46-2.02)  | 0.000          | 96.8                  | 0.000          | 0.324              |
| Squamous cell carcinoma           | Pouplard et al, 2013  | 0/0/7/7                                               | 27150            | 449        | RR             | 5.31 (2.63-10.71) | <0.0001        | 95.0                  | <0.0001        | 0.562              |
| Rectal cancer                     | Fu et al, 2020        | 0/0/3/3                                               | 32270            | 125        | HR             | 1.18 (0.99-1.41)  | 0.062          | 0.0                   | 0.425          | 0.492              |
| Melanoma                          | Pouplard et al, 2013  | 0/0/6/6                                               | 26150            | 253        | RR             | 1.07 (0.85-1.35)  | 0.580          | 39.0                  | 0.150          | 0.231              |
| <b>Cardiovascular system</b>      |                       |                                                       |                  |            |                |                   |                |                       |                |                    |
| CVD                               | Gaeta et al, 2013     | 4/5/4/13                                              | 45369597         | 567569     | RR             | 1.24 (1.18-1.31)  | 0.000          | 93.4                  | 0.000          | 0.017              |
| MI                                | Gaeta et al, 2013     | 2/3/3/8                                               | 41250185         | 105088     | RR             | 1.25 (1.11-1.39)  | 0.000          | 83.2                  | 0.000          | 0.429              |
| Stroke                            | Raaby et al, 2017     | 0/0/5/5                                               | 5777211          | 16110      | HR             | 1.17 (1.07-1.28)  | 0.000          | 78.5                  | 0.000          | 0.343              |
| Hypertension                      | Duan et al, 2020      | 10/4/2/16                                             | 1069763          | 126838     | OR             | 1.46 (1.28-1.66)  | 0.000          | 94.1                  | 0.000          | 0.043              |
| Pediatric hypertension            | Cho et al, 2021       | 6/2/0/8                                               | 5237538          | 61384      | OR             | 2.73 (1.79-4.17)  | 0.000          | 72.0                  | 0.001          | 0.638              |
| Pediatric IHD or heart failure    | Phan et al, 2020      | 0/0/3/3                                               | 5231916          | 7145       | OR             | 3.14 (1.08-9.10)  | 0.035          | 83.7                  | 0.002          | 0.687              |
| Atrial fibrillation               | Upala et al, 2016     | 0/0/4/4                                               | 4574977          | 12755      | HR             | 1.42 (1.22-1.65)  | 0.000          | 68.5                  | 0.007          | 0.255              |
| <b>Nervous system</b>             |                       |                                                       |                  |            |                |                   |                |                       |                |                    |
| Dementia                          | Liu et al, 2020       | 1/1/5/7                                               | 3638487          | 69414      | RR             | 1.16 (1.06-1.27)  | 0.001          | 56.0                  | 0.040          | 0.685              |
| Non-vascular dementia             | Liu et al, 2020       | 0/0/3/3                                               | 3318622          | 63464      | RR             | 1.13 (1.11-1.16)  | 0.000          | 0.0                   | 0.789          | 0.468              |
| Vascular dementia                 | Liu et al, 2020       | 0/0/2/2                                               | 103060           | 601        | RR             | 1.41 (1.09-1.82)  | 0.009          | 0.0                   | 0.538          | NA                 |
| Parkinson's Disease               | Unprasert et al, 2016 | 1/0/3/4                                               | 1130993          | 46827      | OR             | 1.38 (1.15-1.53)  | 0.001          | 35.0                  | 0.200          | 0.72               |
| <b>Gastrointestinal system</b>    |                       |                                                       |                  |            |                |                   |                |                       |                |                    |
| Crohn's disease                   | Fu et al, 2018        | 5/0/4/9                                               | 7794087          | >19322     | OR             | 1.93 (1.52-2.47)  | 0.000          | 85.9                  | 0.000          | 0.977              |
| Ulcerative colitis                | Fu et al, 2018        | 4/0/4/8                                               | 7535087          | >26985     | RR             | 1.77 (1.66-1.88)  | 0.000          | 24.3                  | 0.235          | 0.614              |
| Non-alcoholic fatty liver disease | Candia et al, 2014    | 6/0/0/6                                               | 267761           | 1994       | OR             | 2.15 (1.57-2.94)  | 0.000          | 74.0                  | 0.002          | 0.710              |
| Helicobacter pylori Infection     | Yu et al, 2019        | 4/4/3/11                                              | 2341             | 787        | OR             | 1.70 (1.15-2.52)  | 0.008          | 60.0                  | 0.006          | 0.154              |
| Hepatitis C                       | Zhang et al, 2019     | 2/4/2/8                                               | 2051417          | 3577       | OR             | 1.70 (1.12-2.57)  | 0.012          | 84.2                  | 0.000          | 0.632              |

Supplementary Table 1. (continued)

| Health outcomes                | Author, year          | Case-control/cross-sectional/cohort/Total studies (n) | Participants (n) | Events (n) | Type of metric | Effect size      |                | Heterogeneity         |                | Small-study effect |
|--------------------------------|-----------------------|-------------------------------------------------------|------------------|------------|----------------|------------------|----------------|-----------------------|----------------|--------------------|
|                                |                       |                                                       |                  |            |                | 95% CI           | <i>P</i> Value | <i>I</i> <sup>2</sup> | <i>P</i> Value |                    |
| Celiac disease                 | Acharya et al, 2019   | 4/1/2/7                                               | 5853094          | 136536     | OR             | 2.10 (1.66-2.66) | 0.000          | 52.3                  | 0.026          | 0.202              |
| <b>Respiratory system</b>      |                       |                                                       |                  |            |                |                  |                |                       |                |                    |
| COPD                           | Unprasert et al, 2015 | 5/2/0/7                                               | 422947           | >19098     | OR             | 1.53 (1.29-1.83) | 0.000          | 81.1                  | 0.000          | 0.352              |
| Obstructive Sleep Apnea        | Ger et al, 2020       | 2/1/0/3                                               | 293564           | 834        | OR             | 2.60 (1.07-6.32) | 0.040          | 89.3                  | <0.0001        | 0.193              |
| Asthma                         | Wang et al, 2018      | 3/0/3/6                                               | 644187           | 35933      | OR             | 1.33 (1.21-1.46) | 0.000          | 52.5                  | 0.061          | 0.739              |
| <b>Metabolic diseases</b>      |                       |                                                       |                  |            |                |                  |                |                       |                |                    |
| Obesity                        | Armstrong et al, 2012 | 11/5/0/16                                             | 2365369          | 230248     | OR             | 1.66 (1.46-1.89) | 0.000          | 97.3                  | 0.000          | 0.653              |
| Diabetes                       | Mamizadeh et al, 2019 | 15/11/12/38                                           | 13730940         | 464990     | OR             | 1.69 (1.51-1.89) | <0.001         | 98.5                  | <0.001         | 0.087              |
| Metabolic syndrome             | Qiao et al, 2021      | 14/8/0/22                                             | 137053           | 25917      | OR             | 2.02 (1.67-2.43) | <0.001         | 83.6                  | <0.001         | 0.119              |
| Pediatric overweight           | Phan et al, 2020      | 6/1/1/8                                               | 2563             | 398        | OR             | 1.54 (1.21-1.95) | 0.000          | 40.8                  | 0.106          | 0.628              |
| Pediatric hyperlipidemia       | Phan et al, 2020      | 1/0/5/6                                               | 5292400          | 14594      | OR             | 1.84 (1.65-2.04) | 0.000          | 28.8                  | 0.219          | 0.060              |
| Pediatric metabolic syndrome   | Phan et al, 2020      | 5/0/0/5                                               | 61666            | 310        | OR             | 2.35 (1.75-3.16) | 0.000          | 38.2                  | 0.167          | 0.044              |
| Pediatric obesity              | Cho et al, 2021       | 11/2/0/13                                             | 5239447          | 77086      | OR             | 2.40 (1.60-3.59) | 0.000          | 91.1                  | 0.001          | 0.808              |
| Pediatric diabetes             | Cho et al, 2021       | 6/2/0/8                                               | 5257716          | 25656      | OR             | 2.01 (1.09-3.73) | 0.026          | 89.7                  | 0.000          | 0.985              |
| Pediatric dyslipidemia         | Cho et al, 2021       | 5/2/0/7                                               | 5237434          | 12592      | OR             | 1.67 (1.42-1.97) | 0.000          | 0.0                   | 0.573          | 0.114              |
| <b>Pregnancy outcomes</b>      |                       |                                                       |                  |            |                |                  |                |                       |                |                    |
| Caesarean delivery             | Xie et al, 2021       | 2/0/8/10                                              | 6323672          | >1148489   | OR             | 1.35 (1.14-1.60) | 0.000          | 87.1                  | 0.000          | 0.105              |
| Preterm birth                  | Xie et al, 2021       | 0/0/10/10                                             | 8614144          | >475541    | OR             | 1.45 (1.21-1.74) | 0.000          | 76.6                  | 0.000          | 0.007              |
| (Pre)eclampsia                 | Xie et al, 2021       | 0/0/8/8                                               | 7989798          | >245519    | OR             | 1.28 (1.10-1.49) | 0.001          | 54.7                  | 0.031          | 0.202              |
| Gestational diabetes           | Xie et al, 2021       | 0/0/5/5                                               | 6308489          | >276483    | OR             | 1.21 (1.12-1.31) | 0.000          | 0.0                   | 0.687          | 0.349              |
| Gestational hypertension       | Xie et al, 2021       | 0/0/4/4                                               | 4970699          | >2261      | OR             | 1.28 (1.17-1.40) | 0.000          | 2.7                   | 0.379          | 0.989              |
| Premature rupture of membranes | Xie et al, 2021       | 0/0/3/3                                               | 1709374          | >693       | OR             | 1.17 (1.06-1.29) | 0.002          | 64.9                  | 0.058          | 0.373              |
| Prematurity                    | Xie et al, 2021       | 0/0/2/2                                               | 2350644          | >4         | OR             | 1.12 (1.01-1.25) | 0.033          | 0.0                   | 0.401          | NA                 |

Supplementary Table 1. (continued)

| Health outcomes                | Author, year           | Case-control/cross-sectional/cohort/Total studies (n) | Participants (n) | Events (n) | Type of metric | Effect size      |                | Heterogeneity         |                | Small-study effect |
|--------------------------------|------------------------|-------------------------------------------------------|------------------|------------|----------------|------------------|----------------|-----------------------|----------------|--------------------|
|                                |                        |                                                       |                  |            |                | 95% CI           | <i>P</i> Value | <i>I</i> <sup>2</sup> | <i>P</i> Value |                    |
| Congenital malformations       | Xie et al, 2021        | 0/0/4/4                                               | 963638           | >40432     | OR             | 1.02 (0.91-1.14) | 0.793          | 0.0                   | 0.825          | 0.207              |
| Neonatal mortality             | Xie et al, 2021        | 0/0/3/3                                               | 1756280          | >1155      | OR             | 1.14 (0.90-1.43) | 0.284          | 0.0                   | 0.648          | 0.518              |
| Still birth                    | Xie et al, 2021        | 0/0/5/5                                               | 3510668          | >3630      | OR             | 1.23 (0.93-1.47) | 0.518          | 35.8                  | 0.183          | 0.665              |
| Spontaneous abortion           | Xie et al, 2021        | 0/0/4/4                                               | 48576            | >288       | OR             | 1.44 (0.95-2.17) | 0.086          | 77.3                  | 0.004          | 0.274              |
| Ante- or postpartum hemorrhage | Xie et al, 2021        | 0/0/3/3                                               | 3302340          | >2392      | OR             | 1.12 (0.71-1.76) | 0.630          | 91.2                  | 0.000          | 0.785              |
| Low birth weight               | Xie et al, 2021        | 0/0/5/5                                               | 2365757          | >841       | OR             | 1.15 (0.93-1.42) | 0.456          | 70.0                  | 0.471          | 0.94               |
| Small for gestational age      | Xie et al, 2021        | 0/0/7/7                                               | 704746           | >257327    | OR             | 1.05 (0.99-1.12) | 0.129          | 15.6                  | 0.314          | 0.725              |
| <b>Other outcomes</b>          |                        |                                                       |                  |            |                |                  |                |                       |                |                    |
| CKD                            | Ungprasert et al, 2018 | 0/0/4/4                                               | 919436           | 199808     | RR             | 1.34 (1.14-1.58) | 0.000          | 95.8                  | 0.000          | 0.044              |
| End-stage CKD                  | Ungprasert et al, 2018 | 0/0/3/3                                               | 864949           | 151729     | RR             | 1.29 (1.05-1.60) | 0.015          | 12.6                  | 0.318          | 0.427              |
| Uveitis                        | Li et al, 2020         | 0/0/4/4                                               | 263187128        | >15004     | RR             | 1.50 (1.08-2.08) | 0.015          | 91.0                  | 0.000          | 0.466              |
| Fracture                       | Chen et al, 2020       | 0/0/5/5                                               | 1006349          | 67233      | OR             | 1.09 (1.06-1.11) | 0.000          | 0.0                   | 0.434          | 0.674              |
| Geographic tongue              | Alvarez et al, 2019    | 11/0/0/11                                             | 12327            | 784        | OR             | 3.31 (2.66-4.11) | 0.000          | 48.2                  | 0.037          | 0.198              |
| Multiple sclerosis             | Islam et al, 2019      | 4/0/5/9                                               | NR               | 53863      | RR             | 1.67 (1.46-1.91) | <0.0001        | 0.0                   | 0.486          | 0.443              |
| Erectile dysfunction           | Wu et al, 2018         | 2/6/1/9                                               | 1693957          | 87545      | OR             | 1.93 (1.51-2.46) | <0.0001        | 86.0                  | <0.0001        | 0.036              |
| Aortic aneurysm                | Yu et al, 2020         | 0/0/3/3                                               | 5731399          | 24864      | HR             | 1.30 (1.10-1.55) | 0.002          | 53.5                  | 0.117          | 0.426              |
| Schizophrenia                  | Ungprasert et al, 2018 | 4/0/1/5                                               | 9271621          | 405421     | OR             | 1.35 (1.20-1.53) | 0.000          | 33.1                  | 0.201          | 0.345              |
| Prevalence of depression       | Zusman et al, 2020     | 0/1/3/4                                               | 23794            | >178       | OR             | 1.69 (1.37-2.08) | 0.000          | 96.7                  | 0.000          | 0.911              |
| Incidence of depression        | Zusman et al, 2020     | 0/0/4/4                                               | 28614            | >5270      | RR             | 1.44 (1.20-1.73) | 0.000          | 94.7                  | 0.000          | 0.759              |
| Prevalence of anxiety          | Zusman et al, 2020     | 0/0/2/2                                               | 16128            | >122       | OR             | 1.48 (1.34-1.64) | 0.000          | 0.0                   | 0.780          | NA                 |
| Osteoporosis                   | Sepehri et al, 2021    | 3/2/2/7                                               | 198774970        | 1672184    | OR             | 1.28 (0.86-1.90) | 0.225          | 99.2                  | 0.000          | 0.483              |
| Osteopenia                     | Sepehri et al, 2021    | 0/2/0/2                                               | 198535032        | 309110     | OR             | 1.50 (0.74-3.02) | 0.260          | 99.5                  | 0.000          | 0.601              |
| Suicide                        | Chi et al, 2017        | 0/0/2/2                                               | 527967           | 1074       | RR             | 1.13 (0.87-1.46) | 0.360          | 57.0                  | 0.130          | NA                 |

Supplementary Table 1. (continued)

| Health outcomes | Author, year        | Case-control/cross-sectional/cohort/Total studies (n) | Participants (n) | Events(n) | Type of metric | Effect size      |         | Heterogeneity  |         | Small-study effect |
|-----------------|---------------------|-------------------------------------------------------|------------------|-----------|----------------|------------------|---------|----------------|---------|--------------------|
|                 |                     |                                                       |                  |           |                | 95% CI           | P Value | I <sup>2</sup> | P Value |                    |
| Suicide attempt | Chi et al, 2017     | 0/0/3/3                                               | 720274           | 2102      | RR             | 1.25 (0.89-1.75) | 0.201   | 92.7           | <0.0001 | 0.339              |
| VTE             | Hillary et al, 2021 | 0/0/5/5                                               | 48731075         | 86830     | RR             | 1.29 (0.92-1.80) | 0.139   | 96.8           | 0.000   | 0.281              |

Abbreviation: ACM, all-cause mortality; CVD, cardiovascular disease; MI, myocardial infarction; IHD, ischemic heart disease; COPD, chronic obstructive pulmonary disease; CKD, chronic kidneys disease; VTE, Venous Thromboembolism.
