# Supplementary material for: Psoriasis and medical ramifications: A comprehensive analysis based on observational meta-analyses
Source: PubMed Central journal article supplement (PMC9465012; doi:10.3389/fmed.2022.998815), 2022-08-29
Supplement: Table_2.pdf [file Table_2.pdf]

Supplementary Table 2. The strength of epidemiologic evidence of 85 unique health outcomes.

| Health outcomes                  | Author, year          | Precision of the estimate |                   | Consistency of results                    | No evidence of small-study effects ( $P > 0.1$ ) | Grade    |
|----------------------------------|-----------------------|---------------------------|-------------------|-------------------------------------------|--------------------------------------------------|----------|
|                                  |                       | >1000 disease cases       | $P < 0.001$       | $I^2 < 50\%$ and Cochran Q test $P > .10$ |                                                  |          |
| <b>Mortality</b>                 |                       |                           |                   |                                           |                                                  |          |
| ACM                              | Dhana et al, 2019     | Yes                       | Yes               | No                                        | Yes                                              | Moderate |
| CVD mortality                    | Dhana et al, 2019     | Yes                       | Yes               | No                                        | Yes                                              | Moderate |
| Mortality in liver disease       | Dhana et al, 2019     | No                        | Yes               | No                                        | No                                               | Weak     |
| Mortality in respiratory disease | Dhana et al, 2019     | No                        | No                | Yes                                       | No                                               | Weak     |
| Mortality in kidney disease      | Dhana et al, 2019     | No                        | Yes               | No                                        | No                                               | Weak     |
| Mortality in infections          | Dhana et al, 2019     | No                        | Yes               | Yes                                       | No                                               | Weak     |
| Mortality in malignancy          | Dhana et al, 2019     | Yes                       | No ( $P > 0.05$ ) | Yes                                       | No                                               | NA       |
| Mortality in cancer              | Trafford et al, 2019  | Yes                       | No ( $P > 0.05$ ) | Yes                                       | No                                               | NA       |
| <b>Cancer</b>                    |                       |                           |                   |                                           |                                                  |          |
| Cancer incidence                 | Trafford et al, 2019  | Yes                       | No                | No                                        | Yes                                              | Weak     |
| Respiratory tract cancer         | Pouplard et al, 2013  | No                        | No                | No                                        | No                                               | Weak     |
| Upper aerodigestive tract        | Pouplard et al, 2013  | No                        | Yes               | Yes                                       | Yes                                              | Moderate |
| Urinary tract cancer             | Pouplard et al, 2013  | No                        | No                | Yes                                       | Yes                                              | Weak     |
| Colorectal cancer                | Fu et al, 2020        | Yes                       | Yes               | Yes                                       | No                                               | Moderate |
| Colon cancer                     | Fu et al, 2020        | Yes                       | No                | Yes                                       | No                                               | Weak     |
| Hematologic malignancy           | Bellinato et al, 2021 | No                        | Yes               | Yes                                       | Yes                                              | Moderate |
| Lymphoma                         | Bellinato et al, 2021 | No                        | No                | No                                        | Yes                                              | Weak     |
| Hodgkin lymphoma                 | Bellinato et al, 2021 | No                        | Yes               | Yes                                       | Yes                                              | Moderate |
| Non-Hodgkin lymphoma             | Bellinato et al, 2021 | No                        | No                | No                                        | Yes                                              | Weak     |
| Cutaneous T-cell lymphoma        | Bellinato et al, 2021 | No                        | Yes               | No                                        | Yes                                              | Weak     |
| Multiple myeloma                 | Bellinato et al, 2021 | No                        | No                | Yes                                       | No                                               | Weak     |
| Leukemia                         | Bellinato et al, 2021 | Yes                       | No                | No                                        | Yes                                              | Weak     |

Supplementary Table 2. (continued)

| Health outcomes                   | Author, year           | Precision of the estimate |                   | Consistency of results                    | No evidence of small-study effects ( $P > 0.1$ ) | Grade    |
|-----------------------------------|------------------------|---------------------------|-------------------|-------------------------------------------|--------------------------------------------------|----------|
|                                   |                        | >1000 disease cases       | $P < 0.001$       | $I^2 < 50\%$ and Cochran Q test $P > .10$ |                                                  |          |
| Non-melanoma skin cancer          | Wang et al, 2020       | Yes                       | Yes               | No                                        | Yes                                              | Moderate |
| Squamous cell carcinoma           | Pouplard et al, 2013   | No                        | Yes               | No                                        | Yes                                              | Weak     |
| Rectal cancer                     | Fu et al, 2020         | No                        | No ( $P > 0.05$ ) | Yes                                       | Yes                                              | NA       |
| Melanoma                          | Pouplard et al, 2013   | No                        | No ( $P > 0.05$ ) | Yes                                       | Yes                                              | NA       |
| <b>Cardiovascular system</b>      |                        |                           |                   |                                           |                                                  |          |
| CVD                               | Gaeta et al, 2013      | Yes                       | Yes               | No                                        | No                                               | Weak     |
| MI                                | Gaeta et al, 2013      | Yes                       | Yes               | No                                        | Yes                                              | Moderate |
| Stroke                            | Raaby et al, 2017      | Yes                       | Yes               | No                                        | Yes                                              | Moderate |
| Hypertension                      | Duan et al, 2020       | Yes                       | Yes               | No                                        | No                                               | Weak     |
| Pediatric hypertension            | Cho et al              | Yes                       | Yes               | No                                        | Yes                                              | Moderate |
| Pediatric IHD or heart failure    | Phan et al, 2020       | Yes                       | No                | No                                        | Yes                                              | Weak     |
| Atrial fibrillation               | Upala et al, 2016      | Yes                       | Yes               | No                                        | Yes                                              | Moderate |
| <b>Nervous system</b>             |                        |                           |                   |                                           |                                                  |          |
| Dementia                          | Liu et al, 2020        | Yes                       | No                | No                                        | Yes                                              | Weak     |
| Non-vascular dementia             | Liu et al, 2020        | Yes                       | Yes               | Yes                                       | Yes                                              | High     |
| Vascular dementia                 | Liu et al, 2020        | No                        | No                | Yes                                       | No                                               | Weak     |
| Parkinson's Disease               | Ungprasert et al, 2016 | Yes                       | No                | Yes                                       | Yes                                              | Weak     |
| <b>Gastrointestinal system</b>    |                        |                           |                   |                                           |                                                  |          |
| Crohn's disease                   | Fu et al, 2018         | Yes                       | Yes               | No                                        | Yes                                              | Moderate |
| Ulcerative colitis                | Fu et al, 2018         | Yes                       | Yes               | Yes                                       | Yes                                              | High     |
| Non-alcoholic fatty liver disease | Candia et al, 2014     | Yes                       | Yes               | No                                        | Yes                                              | Moderate |
| Helicobacter pylori Infection     | Yu et al, 2019         | No                        | No                | No                                        | Yes                                              | Weak     |
| Hepatitis C                       | Zhang et al. 2019      | Yes                       | No                | No                                        | Yes                                              | Weak     |

Supplementary Table 2. (continued)

| Health outcomes                | Author, year           | Precision of the estimate |             | Consistency of results                    | No evidence of small-study effects ( $P > 0.1$ ) | Grade    |
|--------------------------------|------------------------|---------------------------|-------------|-------------------------------------------|--------------------------------------------------|----------|
|                                |                        | >1000 disease cases       | $P < 0.001$ | $I^2 < 50\%$ and Cochran Q test $P > .10$ |                                                  |          |
| Celiac                         | Acharya et al, 2019    | Yes                       | Yes         | No                                        | Yes                                              | Moderate |
| <b>Respiratory system</b>      |                        |                           |             |                                           |                                                  |          |
| COPD                           | Ungprasert et al, 2015 | Yes                       | Yes         | No                                        | Yes                                              | Moderate |
| Obstructive Sleep Apnea        | Ger et al, 2020        | No                        | No          | No                                        | Yes                                              | Weak     |
| Asthma                         | Wang et al, 2018       | Yes                       | Yes         | No                                        | Yes                                              | Moderate |
| <b>Metabolic diseases</b>      |                        |                           |             |                                           |                                                  |          |
| Obesity                        | Armstrong et al, 2012  | Yes                       | Yes         | No                                        | Yes                                              | Moderate |
| Diabetes                       | Mamizadeh et al, 2019  | Yes                       | Yes         | No                                        | No                                               | Weak     |
| Metabolic syndrome             | Qiao et al, 2021       | Yes                       | Yes         | No                                        | Yes                                              | Moderate |
| Pediatric overweight           | Phan et al, 2020       | No                        | Yes         | Yes                                       | Yes                                              | Moderate |
| Pediatric hyperlipidemia       | Phan et al, 2020       | Yes                       | Yes         | Yes                                       | No                                               | Moderate |
| Pediatric metabolic syndrome   | Phan et al, 2020       | No                        | Yes         | Yes                                       | No                                               | Weak     |
| Pediatric obesity              | Cho et al, 2021        | Yes                       | Yes         | No                                        | Yes                                              | Moderate |
| Pediatric diabetes             | Cho et al, 2021        | Yes                       | No          | No                                        | Yes                                              | Weak     |
| Pediatric dyslipidemia         | Cho et al, 2021        | Yes                       | Yes         | Yes                                       | Yes                                              | High     |
| <b>Pregnancy outcomes</b>      |                        |                           |             |                                           |                                                  |          |
| Caesarean delivery             | Xie et al, 2021        | Yes                       | Yes         | No                                        | Yes                                              | Moderate |
| Preterm birth                  | Xie et al, 2021        | Yes                       | Yes         | No                                        | No                                               | Weak     |
| (Pre)eclampsia                 | Xie et al, 2021        | Yes                       | No          | No                                        | Yes                                              | Weak     |
| Gestational diabetes           | Xie et al, 2021        | Yes                       | Yes         | Yes                                       | Yes                                              | High     |
| Gestational hypertension       | Xie et al, 2021        | Yes                       | Yes         | Yes                                       | Yes                                              | High     |
| Premature rupture of membranes | Xie et al, 2021        | No                        | No          | No                                        | Yes                                              | Weak     |
| Prematurity                    | Xie et al, 2021        | No                        | No          | Yes                                       | No                                               | Weak     |

Supplementary Table 2. (continued)

| Health outcomes                | Author, year           | Precision of the estimate |                   | Consistency of results                    | No evidence of small-study effects ( $P > 0.1$ ) | Grade    |
|--------------------------------|------------------------|---------------------------|-------------------|-------------------------------------------|--------------------------------------------------|----------|
|                                |                        | >1000 disease cases       | $P < 0.001$       | $I^2 < 50\%$ and Cochran Q test $P > .10$ |                                                  |          |
| Congenital malformations       | Xie et al, 2021        | Yes                       | No ( $P > 0.05$ ) | Yes                                       | Yes                                              | NA       |
| Neonatal mortality             | Xie et al, 2021        | Yes                       | No ( $P > 0.05$ ) | Yes                                       | Yes                                              | NA       |
| Still birth                    | Xie et al, 2021        | Yes                       | No ( $P > 0.05$ ) | Yes                                       | Yes                                              | NA       |
| Spontaneous abortion           | Xie et al, 2021        | No                        | No ( $P > 0.05$ ) | No                                        | Yes                                              | NA       |
| Ante- or postpartum hemorrhage | Xie et al, 2021        | Yes                       | No ( $P > 0.05$ ) | No                                        | Yes                                              | NA       |
| Low birth weight               | Xie et al, 2021        | No                        | No ( $P > 0.05$ ) | No                                        | Yes                                              | NA       |
| Small for gestational age      | Xie et al, 2021        | Yes                       | No ( $P > 0.05$ ) | Yes                                       | Yes                                              | NA       |
| <b>Other outcomes</b>          |                        |                           |                   |                                           |                                                  |          |
| CKD                            | Ungprasert et al, 2018 | Yes                       | Yes               | No                                        | No                                               | Weak     |
| End-stage CKD                  | Ungprasert et al, 2018 | Yes                       | No                | Yes                                       | Yes                                              | Weak     |
| Uveitis                        | Li et al, 2020         | Yes                       | No                | No                                        | Yes                                              | Weak     |
| Fracture                       | Chen et al, 2020       | Yes                       | Yes               | Yes                                       | Yes                                              | High     |
| Geographic tongue              | Alvarez et al, 2019    | No                        | Yes               | No                                        | Yes                                              | Weak     |
| Multiple sclerosis             | Islam et al, 2019      | Yes                       | Yes               | Yes                                       | Yes                                              | High     |
| Erectile dysfunction           | Wuet et al, 2018       | Yes                       | Yes               | No                                        | No                                               | Weak     |
| Aortic aneurysm                | Yu et al, 2020         | Yes                       | No                | No                                        | Yes                                              | Weak     |
| Schizophrenia                  | Ungprasert et al, 2018 | Yes                       | Yes               | Yes                                       | Yes                                              | High     |
| Prevalence of depression       | Zusman et al, 2020     | No                        | Yes               | No                                        | Yes                                              | Weak     |
| Incidence of depression        | Zusman et al, 2020     | Yes                       | Yes               | No                                        | Yes                                              | Moderate |
| Prevalence of anxiety          | Zusman et al, 2020     | No                        | Yes               | Yes                                       | No                                               | Weak     |
| Osteoporosis                   | Sepehri et al, 2021    | Yes                       | No ( $P > 0.05$ ) | No                                        | Yes                                              | NA       |
| Osteopenia                     | Sepehri et al, 2021    | Yes                       | No ( $P > 0.05$ ) | No                                        | Yes                                              | NA       |
| Suicide                        | Chi et al, 2017        | Yes                       | No ( $P > 0.05$ ) | No                                        | No                                               | NA       |

Supplementary Table 2. (continued)

| Health outcomes | Author, year        | Precision of the estimate |                   | Consistency of results                    | No evidence of small-study effects ( $P > 0.1$ ) | Grade |
|-----------------|---------------------|---------------------------|-------------------|-------------------------------------------|--------------------------------------------------|-------|
|                 |                     | >1000 disease cases       | $P < 0.001$       | $I^2 < 50\%$ and Cochran Q test $P > .10$ |                                                  |       |
| Suicide attempt | Chi et al, 2017     | Yes                       | No ( $P > 0.05$ ) | No                                        | Yes                                              | NA    |
| VTE             | Hillary et al, 2021 | Yes                       | No ( $P > 0.05$ ) | No                                        | Yes                                              | NA    |

Abbreviations: ACM, all-cause mortality; CVD, cardiovascular disease; MI, myocardial infarction; IHD, ischemic heart disease; COPD, chronic obstructive pulmonary disease; CKD, chronic kidneys disease; VTE, Venous Thromboembolism.

NOTE. The strength of epidemiologic evidence was rated as follows:

High, if all criteria were satisfied: precision of the estimate ( $P < .001$  and >1000 disease cases), consistency of results ( $I^2 < 50\%$  and Cochran Q test  $P > .10$ ), and no evidence of small-study effects ( $P > .10$ ).

Moderate, if a maximum of 1 criterion was not satisfied and a  $P < .001$  was found.

Weak, in other cases ( $P < .05$ ).

NA, P values are greater than 0.05, so the epidemiologic quality of these meta cannot be rated.
