# Supplementary material for: Psoriasis and medical ramifications: A comprehensive analysis based on observational meta-analyses
Source: PubMed Central journal article supplement (PMC9465012; doi:10.3389/fmed.2022.998815), 2022-08-29
Supplement: Table_3.pdf [file Table_3.pdf]

Supplementary table 3. (continued)

| Reference              | AMSTAR 2 checklist |      |      |      |      |      |      |      |      |       |       |       |       |       |       |       | Overall assessment<br>quality |
|------------------------|--------------------|------|------|------|------|------|------|------|------|-------|-------|-------|-------|-------|-------|-------|-------------------------------|
|                        | NO.1               | NO.2 | NO.3 | NO.4 | NO.5 | NO.6 | NO.7 | NO.8 | NO.9 | NO.10 | NO.11 | NO.12 | NO.13 | NO.14 | NO.15 | NO.16 |                               |
| Armstrong et al, 2012  | Y                  | N    | Y    | pY   | Y    | Y    | Y    | Y    | Y    | N     | Y     | N     | N     | N     | Y     | Y     | Critically low                |
| Mamizadeh et al, 2019  | Y                  | Y    | Y    | Y    | N    | N    | N    | Y    | Y    | N     | Y     | Y     | Y     | Y     | Y     | Y     | Low                           |
| Qiao et al, 2021       | Y                  | N    | Y    | pY   | Y    | Y    | N    | N    | N    | N     | Y     | N     | N     | Y     | Y     | Y     | Critically low                |
| Xie et al, 2021        | Y                  | N    | Y    | Y    | Y    | Y    | N    | Y    | Y    | N     | N     | Y     | Y     | Y     | Y     | Y     | Critically low                |
| Ungprasert et al, 2018 | Y                  | N    | Y    | pY   | Y    | Y    | N    | Y    | Y    | N     | Y     | Y     | Y     | Y     | Y     | Y     | Critically low                |
| Li et al, 2020         | Y                  | N    | Y    | pY   | Y    | Y    | N    | Y    | Y    | N     | Y     | Y     | Y     | Y     | Y     | Y     | Critically low                |
| Chen et al, 2020       | Y                  | Y    | Y    | Y    | Y    | Y    | N    | Y    | Y    | N     | Y     | Y     | Y     | Y     | Y     | Y     | Low                           |
| Alvarez et al, 2019    | Y                  | N    | Y    | pY   | Y    | Y    | N    | N    | Y    | N     | Y     | Y     | Y     | Y     | Y     | Y     | Critically low                |
| Islam et al, 2019      | Y                  | N    | Y    | pY   | Y    | Y    | N    | N    | Y    | N     | Y     | Y     | Y     | Y     | Y     | Y     | Critically low                |
| Wu et al, 2018         | Y                  | N    | Y    | pY   | Y    | Y    | N    | Y    | Y    | N     | Y     | Y     | Y     | Y     | Y     | Y     | Critically low                |
| Yu et al, 2020         | Y                  | N    | Y    | pY   | Y    | N    | N    | Y    | Y    | N     | Y     | N     | N     | Y     | N     | Y     | Critically low                |
| Ungprasert et al, 2018 | Y                  | N    | Y    | pY   | Y    | Y    | N    | N    | Y    | N     | Y     | Y     | Y     | N     | Y     | Y     | Critically low                |
| Zusman et al, 2020     | Y                  | N    | Y    | pY   | N    | N    | N    | Y    | Y    | N     | Y     | N     | N     | Y     | N     | Y     | Critically low                |
| Sepehri et al, 2021    | Y                  | N    | Y    | pY   | Y    | Y    | N    | N    | Y    | N     | Y     | N     | Y     | N     | Y     | Y     | Critically low                |
| Chi et al, 2017        | Y                  | N    | Y    | pY   | N    | N    | N    | N    | Y    | N     | Y     | N     | N     | N     | Y     | Y     | Critically low                |
| Hillary et al, 2021    | Y                  | Y    | Y    | Y    | Y    | N    | Y    | Y    | Y    | N     | Y     | N     | Y     | N     | N     | Y     | Low                           |

AMSTAR 2 checklist (items in *italic* are considered critical):

1, PICO description; 2, protocol registered before the commencement of the review; 3, study design included in the review; 4, adequacy of the literature search; 5, two authors study selection; 6, two authors study extraction; 7, list for excluding individual studies; 8, included studies described in detail; 9, risk of bias for the single studies that included in the review; 10, source of funding of primary studies; 11, appropriateness of meta-analytical methods; 12, impact of risk of bias of single studies on the results of the meta-analysis; 13, consideration of risk of bias when interpreting the results of the review; 14 explanation and discussion of the heterogeneity observed; 15, assessment of presence and likely impact of publication bias; 16, funding sources and conflict of interest declared.

Abbreviations: Y, yes; pY, partial yes; N, no.

**Footnotes:**

**High:** 0–1 non-critical weakness. The systematic review provides an accurate and comprehensive summary of the results of the available studies that address the question of interest.

**Moderate:** >1 non-critical weakness. The systematic review has more than one weakness, but no critical flaws. It may provide an accurate summary of the results of the available studies that were included in the review.

**Low:** 1 critical flaw with or without non-critical weaknesses. The review has a critical flaw and may not provide an accurate and comprehensive summary of the available studies that address the question of interest.

**Critically low:** >1 critical flaw with or without non-critical weaknesses. The review has more than one critical flaw and should not be relied on to provide an accurate and comprehensive summary of the available studies.

No2, 4, 7, 9, 11, 13, 15 are the critical items.
